# Supplementary material for: Recent Trends in Research with Human Pluripotent Stem Cells: Impact of Research and Use of Cell Lines in Experimental Research and Clinical Trials
Source: PubMed Central journal article supplement — Stem Cell Reports. 2018 Jul 19;11(2):485–96. doi: 10.1016/j.stemcr.2018.06.012 (PMC6092712; doi:10.1016/j.stemcr.2018.06.012), 2018-07-19
Supplement: mmc1.pdf [file mmc1.pdf]

**Stem Cell Reports, Volume 11**

**Supplemental Information**

**Recent Trends in Research with Human Pluripotent Stem Cells: Impact of Research and Use of Cell Lines in Experimental Research and Clinical Trials**

**Anke Guhr, Sabine Kobold, Stefanie Seltmann, Andrea E.M. Seiler Wulczyn, Andreas Kurtz, and Peter Löser**

## Supplementary tables

**Supplementary Table 1: Grouped citation frequencies of hESC research papers**

| Country        | Average citations per year (% of papers) |      |      |      |
|----------------|------------------------------------------|------|------|------|
|                | ≤ 5                                      | ≤ 10 | ≤ 15 | >15  |
| Australia      | 86.8                                     | 5.3  | 5.3  | 2.6  |
| Belgium        | 72.4                                     | 24.1 | 0.0  | 3.4  |
| Canada         | 48.2                                     | 16.1 | 10.7 | 25   |
| China          | 82.5                                     | 11,9 | 2.5  | 3.1  |
| Finland        | 71.8                                     | 21.9 | 0.0  | 6.3  |
| France         | 60.0                                     | 20.0 | 5.0  | 15.0 |
| Germany        | 40.7                                     | 25.9 | 14.8 | 18.5 |
| Japan          | 45.2                                     | 20.5 | 13.7 | 20.5 |
| Iran           | 88.5                                     | 11.5 | 0.0  | 0.0  |
| Israel         | 66.7                                     | 14.3 | 7.1  | 11.9 |
| Korea          | 63.0                                     | 24.7 | 5.5  | 6.8  |
| Netherlands    | 23.8                                     | 19.0 | 19.0 | 38.1 |
| Singapore      | 55.9                                     | 27.1 | 6.8  | 10.2 |
| Sweden         | 67.9                                     | 17.9 | 3.6  | 10.7 |
| Spain          | 81.0                                     | 14.3 | 0.0  | 4.8  |
| United Kingdom | 44.7                                     | 33.0 | 7.8  | 14.6 |
| United States  | 44.9                                     | 23.1 | 11.7 | 20.3 |
| <b>Total</b>   | 56.0                                     | 20.9 | 8.4  | 14.7 |

**Supplementary Table 2: Grouped citation frequencies of hiPSC research papers**

| Country       | Average citations per year (% of papers) |      |      |      |
|---------------|------------------------------------------|------|------|------|
|               | ≤ 5                                      | ≤ 10 | ≤ 15 | >15  |
| Australia     | 60.0                                     | 10.0 | 20.0 | 10.0 |
| Canada        | 42.9                                     | 25.0 | 7.1  | 25.0 |
| China         | 61.5                                     | 22.2 | 8.1  | 8.1  |
| Finland       | 50                                       | 25   | 12.5 | 12.5 |
| France        | 56.4                                     | 17.9 | 10.3 | 15.4 |
| Germany       | 42.5                                     | 27.7 | 16.0 | 14.2 |
| Iran          | 80.6                                     | 19.4 | 0.0  | 0.0  |
| Israel        | 48.1                                     | 11.1 | 22.2 | 18.5 |
| Italy         | 43.5                                     | 26.1 | 13.0 | 17.4 |
| Japan         | 54.9                                     | 23.3 | 8.9  | 12.8 |
| Korea         | 57.4                                     | 27.7 | 6.4  | 8.5  |
| Netherlands   | 18.6                                     | 37.5 | 12.5 | 31.3 |
| Singapore     | 56.4                                     | 25.6 | 7.7  | 10.3 |
| Spain         | 62.5                                     | 18.8 | 12.5 | 6.3  |
| Sweden        | 62.5                                     | 12.5 | 0.0  | 25.0 |
| UK            | 33.3                                     | 33.3 | 11.1 | 22.2 |
| United States | 31.2                                     | 28.0 | 17.2 | 23.6 |
| <b>Total</b>  | 53.2                                     | 22.6 | 10.3 | 14.0 |

Shown is the share of papers from selected countries within the indicated range of citations per year. Frequencies of citations per year of individual papers from the hESC field (table 1) and the hiPSC field (table 2) were assigned to 4 groups (up to 5, up to 10, up to 15 and more than 15 citations per paper and year). Shown is the percentage of papers from the respective country in each group.

**Supplementary Table 3: Origin of stem cell products used in hESC based clinical trials**

| <b>hESC Line</b> | <b>Number of Clinical Trials</b> | <b>First Publication of Cell Line</b> |
|------------------|----------------------------------|---------------------------------------|
| Cyt 49           | 4                                | 2006                                  |
| H1               | 2                                | 1998                                  |
| H9               | 2                                | 1998                                  |
| HADC102          | 1                                | 2012                                  |
| I6               | 1                                | 2002                                  |
| MA09             | 11                               | 2006                                  |
| Shef 1           | 1                                | 2004                                  |
| not specified    | 7                                |                                       |
